# Supplementary material
Source: publisher figshare collection journal article supplement (https://gsajournals.figshare.com/articles/dataset/_/13551626)
Supplement: Supplementary file 1 [file 1]

Supplemental Table 3. Spatial expression patterns of KH domain RBPs.

| Gene              | Tissue Transcriptome <sup>a</sup>                | Tissue Proteome <sup>b</sup>          | Tissue promoterome <sup>c</sup>                                            |
|-------------------|--------------------------------------------------|---------------------------------------|----------------------------------------------------------------------------|
| <i>fu1-3</i>      | Hypodermis, body wall muscle, intestine          | Hypodermis, intestine, muscle, neuron | n.d.                                                                       |
| <i>fu1-4</i>      | n.d. <sup>d</sup>                                | Hypodermis                            | n.d.                                                                       |
| <i>fu1-1</i>      | Hypodermis, body wall muscle, intestine          | Hypodermis, intestine, muscle, neuron | pharynx, vulva, spermatheca, muscle, hypodermis, seam cells, neurons       |
| <i>fu1-2</i>      | Hypodermis, body wall muscle, intestine          | Hypodermis, intestine, muscle, neuron | n.d.                                                                       |
| <i>imph-1</i>     | Hypodermis, body wall muscle, intestine          | Hypodermis, intestine, muscle, neuron | pharynx, intestine, distal tip cell, spermatheca, hypodermis, neurons      |
| <i>pes-4</i>      | Intestine                                        | Hypodermis, intestine, muscle, neuron | n.d.                                                                       |
| <i>T10E9.14</i>   | n.d.                                             | n.d.                                  | n.d.                                                                       |
| <i>hrpk-1</i>     | Hypodermis, body wall muscle, pharynx, intestine | Hypodermis, intestine, muscle, neuron | n.d.                                                                       |
| <i>nova-1</i>     | Hypodermis, body wall muscle, pharynx, intestine | Hypodermis, intestine, muscle, neuron | n.d.                                                                       |
| <i>vglm-1</i>     | Hypodermis, body wall muscle, pharynx, intestine | Hypodermis, intestine, muscle, neuron | n.d.                                                                       |
| <i>mex-3</i>      | n.d.                                             | Hypodermis, intestine, muscle, neuron | n.d.                                                                       |
| <i>mxt-1</i>      | Body wall muscle                                 | Hypodermis, intestine, muscle, neuron | n.d.                                                                       |
| <i>ascc-1</i>     | Hypodermis, intestine                            | Hypodermis, intestine, muscle, neuron | n.d.                                                                       |
| <i>akap-1</i>     | Hypodermis, body wall muscle, intestine          | Hypodermis, intestine, muscle, neuron | n.d.                                                                       |
| <i>tofu-7</i>     | n.d.                                             | Intestine                             | n.d.                                                                       |
| <i>C06G4.1</i>    | n.d.                                             | Hypodermis, muscle                    | n.d.                                                                       |
| <i>E02D9.1</i>    | Hypodermis, body wall muscle, pharynx, intestine | Hypodermis, intestine, muscle, neuron | pharynx, intestine, muscle, vulva, hypodermis, neurons, ventral nerve cord |
| <i>sfa-1</i>      | Hypodermis, intestine                            | Hypodermis, intestine, muscle, neuron | n.d.                                                                       |
| <i>asd-2</i>      | Hypodermis, body wall muscle, pharynx            | Hypodermis, intestine, muscle, neuron | n.d.                                                                       |
| <i>gld-1</i>      | n.d.                                             | Hypodermis, intestine, muscle, neuron | n.d.                                                                       |
| <i>B0280.17</i>   | n.d.                                             | n.d.                                  | n.d.                                                                       |
| <i>F54D1.1</i>    | n.d.                                             | Intestine                             | n.d.                                                                       |
| <i>Y57G11C.36</i> | n.d.                                             | Hypodermis, intestine, muscle, neuron | n.d.                                                                       |
| <i>K07H8.9</i>    | n.d.                                             | Hypodermis, intestine                 | n.d.                                                                       |
| <i>Y69A2AR.32</i> | n.d.                                             | Hypodermis, intestine                 | n.d.                                                                       |
| <i>bcc-1</i>      | Hypodermis                                       | Hypodermis                            | n.d.                                                                       |
| <i>C41G7.3</i>    | n.d.                                             | Intestine                             | n.d.                                                                       |
| <i>pno-1</i>      | Hypodermis                                       | Hypodermis, intestine, muscle, neuron | n.d.                                                                       |
| <i>mask-1</i>     | Hypodermis, body wall muscle, pharynx, intestine | Hypodermis, intestine, muscle, neuron | pharynx, intestine, rectum, vulva, hypodermis, seam cells, neurons         |

<sup>a</sup> Kaletsky et al., 2018. Transcriptome analysis of adult *Caenorhabditis elegans* cells reveals tissue-specific gene and isoform expression

<sup>b</sup> Reinke et al., 2018. In vivo mapping of tissue- and subcellular-specific proteomes in *Caenorhabditis elegans*

<sup>c</sup> Hunt-Newbury et al., 2007. High-Throughput In Vivo Analysis of Gene Expression in *Caenorhabditis elegans*

<sup>d</sup> No data available for gene within referenced dataset
