# Supplementary material
Source: publisher figshare collection journal article supplement (https://gsajournals.figshare.com/articles/dataset/_/13551626)
Supplement: Supplementary file 2 [file 1]

Supplemental Table 2. Percent abnormal phenotype and numbers of animals scored per replicate in *let-7* and *alg-1* mutant assays.

| Gene<br>Assay<br>RNAi | <i>let-7</i>         |                                                    |                                                                |                                                                             |                                                                     | <i>alg-1</i>                                                |
|-----------------------|----------------------|----------------------------------------------------|----------------------------------------------------------------|-----------------------------------------------------------------------------|---------------------------------------------------------------------|-------------------------------------------------------------|
|                       | N2<br>% Bursting (n) | <i>let-7(n2853)</i><br>% Bursting (n)              | <i>lin-41::gfp</i><br>Relative Fluorescence<br>GFP/mCherry (n) | <i>lin-41::gfp;let-7(n2853)</i><br>Relative Fluorescence<br>GFP/mCherry (n) | <i>lin-41::gfp</i> ΔLCS<br>Relative Fluorescence<br>GFP/mCherry (n) | <i>alg-1(ma202)</i><br>% wildtype<br><i>col-19::gfp</i> (n) |
| Empty vector          | 0(60), 0(27)         | 6.7(60), 8.3(60), 13(69), 18.3(60), 11(55), 25(60) | 1.73 ± 0.44 (30)                                               | 3.88 ± 0.62 (25)                                                            | 4.42 ± 0.77 (28)                                                    | 0(14), 0(19)                                                |
| <i>dcr-1</i>          | 0(60), 0(30)         | 27(59), 36.7(60), 37.3(51), 32.4(111)              | 1.94 ± 0.48 (30)                                               | 4.84 ± 0.98 (30)                                                            | 5.28 ± 1.2 (21)                                                     | 0(14), 0(12)                                                |
| <i>fulb-3</i>         | 0(60), 0(38)         | 27.6(47), 41.7(48), 25.9(166)                      | n.d. <sup>a</sup>                                              | n.d.                                                                        | n.d.                                                                | 0(17), 0(14)                                                |
| <i>fulb-4</i>         | 0(60), 0(30)         | 20.8(48), 4(50), 25.9(27), 7.1(84)                 | n.d.                                                           | n.d.                                                                        | n.d.                                                                | 0(14), 0(18)                                                |
| <i>fulb-1</i>         | 0(60), 0(32)         | 32.7(), 25(0), 20(), 19.1(241)                     | n.d.                                                           | n.d.                                                                        | n.d.                                                                | 0(9), 5.3(19)                                               |
| <i>fulb-2</i>         | 0(60), 0(48)         | 14(50), 14(50), 12(50), 8.7(104)                   | n.d.                                                           | n.d.                                                                        | n.d.                                                                | 0(8), 4.5(22)                                               |
| <i>imph-1</i>         | 0(60), 0(47)         | 12(50), 8.3(4), 9.5(42), 8.2(183)                  | n.d.                                                           | n.d.                                                                        | n.d.                                                                | 0(20), 7.7(13), 14.3(7)                                     |
| <i>pes-4</i>          | 0(60), 0(36)         | 8.6(46), 10.4(58), 12.7(245)                       | n.d.                                                           | n.d.                                                                        | n.d.                                                                | 0(8), 0(12)                                                 |
| <i>T10E9.14</i>       | 0(60), 0(49)         | 21.7(60), 10(50)                                   | n.d.                                                           | n.d.                                                                        | n.d.                                                                | 0(23), 0(12)                                                |
| <i>nova-1</i>         | 0(60), 0(30)         | 14.3(49), 14.2(49), 4.3(47), 13.1(160)             | n.d.                                                           | n.d.                                                                        | n.d.                                                                | 0(16), 5.9(17)                                              |
| <i>mxt-1</i>          | 0(60), 0(47)         | 40.8(49), 34(50), 25.5(43), 13.3(181)              | 2.1 ± 0.44 (29)                                                | 4.98 ± 1.1 (30)                                                             | 5.01 ± 0.87 (27)                                                    | 0(12), 0(18)                                                |
| <i>ascc-1</i>         | 0(60), 0(45)         | 12.2(49), 23.3(60), 10.2(167)                      | n.d.                                                           | n.d.                                                                        | n.d.                                                                | 8.3(12), 0(6)                                               |
| <i>akap-1</i>         | 0(60), 0(30)         | 16.7(48), 10(50), 24(50), 2.1(97)                  | n.d.                                                           | n.d.                                                                        | n.d.                                                                | 14.3(21), 0(21)                                             |
| <i>tofu-7</i>         | 0(60), 0(31)         | 25(48), 14(50), 13.4(112)                          | n.d.                                                           | n.d.                                                                        | n.d.                                                                | 0(18), 0(16)                                                |
| <i>C06G4.1</i>        | 0(60), 0(33)         | 6.0(50), 15.8(57)                                  | n.d.                                                           | n.d.                                                                        | n.d.                                                                | 0(8), 4.5(22)                                               |
| <i>E02D9.1</i>        | 0(60), 0(21)         | 11.6(60), 8.8(80), 1.2(81)                         | n.d.                                                           | n.d.                                                                        | n.d.                                                                | 71.4(7), 45.5(18)                                           |
| <i>sfa-1</i>          | 0(60), 0(33)         | 13.3(60), 16(50), 54(50), 18(150)                  | 1.92 ± 0.52 (30)                                               | 4.69 ± 0.93 (30)                                                            | 5.35 ± 0.96 (30)                                                    | 11.1(19), 0(12), 10.5(18)                                   |
| <i>asd-2</i>          | 0(60), 0(35)         | 21.7(60), 58.3(48), 38(50), 12.4(162)              | 1.83 ± 0.44 (30)                                               | 14.64 ± 0.81 (27)                                                           | 5.88 ± 1.03 (29)                                                    | 0(19), 0(23)                                                |
| <i>B0280.17</i>       | 0(60), 0(32)         | 25(48), 38(50)                                     | 2.05 ± 0.55 (30)                                               | 5.08 ± 1.35 (30)                                                            | 4.72 ± 1.47 (30)                                                    | 0(6), 0(24)                                                 |
| <i>F54D1.1</i>        | 0(60), 0(58)         | 10.4(48), 24(50), 19(58), 9.5(168)                 | n.d.                                                           | n.d.                                                                        | n.d.                                                                | 0(3), 0(26)                                                 |
| <i>K07H8.9</i>        | 1.8(54), 0(60)       | 4.1(49), 14.6(48), 14(50), 6.1(98)                 | n.d.                                                           | n.d.                                                                        | n.d.                                                                | 0(16), 5.9(17)                                              |
| <i>Y69A2AR.32</i>     | 0(43), 1.6(63)       | 15.5(45), 10(50), 10.8(111)                        | n.d.                                                           | n.d.                                                                        | n.d.                                                                | 7.1(14), 4.8(21)                                            |
| <i>bcc-1</i>          | 0(60), 0(25)         | 37.7(49), 38.7(49), 16.5(176)                      | n.d.                                                           | n.d.                                                                        | n.d.                                                                | 0(14), 0(12)                                                |
| <i>C41G7.3</i>        | 0(60), 0(38)         | 8.2(49), 14(50), 26(50), 5.3(113)                  | n.d.                                                           | n.d.                                                                        | n.d.                                                                | 0(15), 4.3(23), 0(20)                                       |
| <i>pno-1</i>          | 0(60), 0(37)         | 16(50), 12(50), 22(50), 5.9(136)                   | n.d.                                                           | n.d.                                                                        | n.d.                                                                | 0(8), 0(17)                                                 |
| <i>mask-1</i>         | 0(60), 0(36)         | 16.3(49), 12(50), 10.5(153)                        | n.d.                                                           | n.d.                                                                        | n.d.                                                                | 0(5), 0(20)                                                 |

<sup>a</sup> n.d. - not determined
