# Supplementary material
Source: publisher figshare collection journal article supplement (https://gsajournals.figshare.com/articles/dataset/_/13551626)
Supplement: Supplementary file 3 [file 1]

Supplemental Table 1. Percent abnormal phenotype and numbers of animals scored per replicate in *lsy-6* and *mir-48 mir-241* mutant assays.

| Gene<br>Assay<br>RNAi | <i>lsy-6</i>                                       |                                                                                                                            |                                                          |                                                                        | <i>mir-48 mir-241(nDf51)</i>                               |                                                                                             |                                                   |
|-----------------------|----------------------------------------------------|----------------------------------------------------------------------------------------------------------------------------|----------------------------------------------------------|------------------------------------------------------------------------|------------------------------------------------------------|---------------------------------------------------------------------------------------------|---------------------------------------------------|
|                       | <i>plim-6::gfp</i><br>% cell fate<br>defective (n) | <i>lsy-6(ot150); plim-6::gfp</i><br>% cell fate<br>defective (n)                                                           | <i>pcog-1::gfp</i><br>% uterine<br><i>cog-1::gfp</i> (n) | <i>pcog-1::gfp; lsy-6(ot150)</i><br>% uterine<br><i>cog-1::gfp</i> (n) | <i>col-19::gfp</i><br>% abnormal<br><i>col-19::gfp</i> (n) | <i>mir-48 mir-241(nDf51)</i><br>% abnormal<br><i>col-19::gfp</i> (n)                        | <i>hbl-1::gfp</i><br>% abnormal<br>expression (n) |
| <i>Empty vector</i>   | 0(50), 0(40)                                       | 10.4(96), 17.8(29), 21(108), 20.8(48), 10.4(9), 14(114), 14.6(48), 113.7(73), 14.5(0)                                      | 100(19), 100(22)                                         | 45(22), 44.4(27), 42.1(19)                                             | 0(3), 0(14)                                                | 8.3(12), 0(10), 10(30), 9.1(11), 7.4(27), 10(10), 10.5(19), 15.4(13), 29.4(17)              | 18.2(33), 22.2(18), 16.7(18)                      |
| <i>dcr-1</i>          | 0(38), 0(41)                                       | 30.5(105), 56.6(53), 35(113), 33.7(104), 30.6(88), 33(104), 35.8(67), 40(35), 30(50), 41.2(34), 34.2(76), 18(53), 34.4(64) | 100(13), 94.4(36)                                        | 66.6(21), 70(20), 58.5(41), 45.8(24)                                   | 0(10), 0(15)                                               | 63.6(11), 71.4(14), 88.9(9), 89.7(29), 89.3(28), 70(30), 88.9(18), 95(12), 46.7(15), 90(20) | 27.9(43), 48.1(27), 39.1(23)                      |
| <i>fulb-3</i>         | 0(43), 0(34)                                       | 18.9(53), 17.5(63), 15.87(76)                                                                                              | n.d. <sup>a</sup>                                        | n.d.                                                                   | 0(16), 0(13)                                               | 64(25), 36.8(19)                                                                            | 14.7(34), 30(20), 27.3(22)                        |
| <i>fulb-4</i>         | 0(50), 0(31)                                       | 25.9(54), 19.2(83), 15(100), 23.1(78)                                                                                      | 100(13), 100(33)                                         | 34.1(41), 59.1(22)                                                     | 0(15), 0(15)                                               | 44.4(18), 55(22)                                                                            | 18.4(38), 33.3(21), 23(13)                        |
| <i>fulb-1</i>         | 0(62), 0(41)                                       | 22(100), 26.6(53), 12.7(71), 20.4(49), 11.2(169), 22.6(128)                                                                | n.d.                                                     | n.d.                                                                   | 0(15), 0(12)                                               | 30(11), 80(30), 12.5(24), 26.3(19)                                                          | n.d.                                              |
| <i>fulb-2</i>         | 0(47), 0(46)                                       | 23.6(89), 22(150), 19.4(62), 16.9(124), 16.7(60)                                                                           | n.d.                                                     | n.d.                                                                   | 0(15), 0(15)                                               | 29.4(17), 37.5(8), 0(10)                                                                    | n.d.                                              |
| <i>imph-1</i>         | 0(49), 0(46)                                       | 13.7(87), 21.7(83), 10.3(68), 17.7(147), 12.5(64), 12.9(85)                                                                | n.d.                                                     | n.d.                                                                   | 0(9), 0(15)                                                | 8.7(23), 10(10), 0(12)                                                                      | n.d.                                              |
| <i>pes-4</i>          | 0(28), 0(75)                                       | 33.3(27), 41.4(29), 25.5(55)                                                                                               | 100(20), 100(16)                                         | n.d.                                                                   | 0(12), 0(11)                                               | 20(10), 40(15), 43(14)                                                                      | n.d.                                              |
| <i>T10E9.14</i>       | 0(42), 0(45)                                       | 24.2(66), 20.3(59), 19.6(51)                                                                                               | 100(25), 100(25)                                         | 66.6(18), 61.1(18)                                                     | 0(13), 0(15)                                               | 65.2(23), 38.5(13)                                                                          | 20.5(44), 30.8(13), 54.5(22)                      |
| <i>nova-1</i>         | 0(73), 0(33)                                       | 25(28), 22.1(136), 7.6(170), 14.1(78), 13(122), 6.9(116)                                                                   | n.d.                                                     | n.d.                                                                   | 0(12), 0(15)                                               | 13.3(15), 0(10)                                                                             | n.d.                                              |
| <i>mxt-1</i>          | 0(43), 2.5(40)                                     | 19(84), 14.4(125), 10(40)                                                                                                  | n.d.                                                     | n.d.                                                                   | 0(14), 0(16)                                               | 41.2(17), 26.7(30), 11.8(17)                                                                | n.d.                                              |
| <i>ascc-1</i>         | 0(61), 0(42)                                       | 21.8(55), 9.6(116), 15.6(96), 17.3(23)                                                                                     | n.d.                                                     | n.d.                                                                   | 0(10), 0(15)                                               | 13.3(30), 33.3(18), 7.7(13)                                                                 | n.d.                                              |
| <i>akap-1</i>         | 0(51), 0(37)                                       | 16.2(105), 18.5(54), 21.1(38), 13.2(205)                                                                                   | n.d.                                                     | n.d.                                                                   | 0(16), 0(8)                                                | 36.4(11), 33.4(30), 37.5(16)                                                                | n.d.                                              |
| <i>tofu-7</i>         | 0(32), 0(42)                                       | 23.6(123), 35.5(45), 13.8(130), 19(84), 11.3(150)                                                                          | 94.1(17), 87.1(31)                                       | 70.8(24), 72.8(26)                                                     | 0(13), 0(15)                                               | 56.3(16), 35.3(17), 20(20)                                                                  | 16.1(31), 33.3(18), 38.1(21)                      |
| <i>C06G4.1</i>        | 0(52), 0(40)                                       | 7.6(91), 16.2(68), 11.8(85), 19(58), 14(93)                                                                                | n.d.                                                     | n.d.                                                                   | 0(10), 0(15)                                               | 11.1(27), 16.7(6)                                                                           | n.d.                                              |
| <i>E02D9.1</i>        | 0(40), 0(44)                                       | 21.3(47), 21.5(79), 11.8(34)                                                                                               | n.d.                                                     | n.d.                                                                   | 0(11), 0(8)                                                | 0(10), 0(16), 11.8(17)                                                                      | n.d.                                              |
| <i>sfa-1</i>          | 0(51), 0(36)                                       | 30(10), 33.9(56), 29.5(78), 34.2(38)                                                                                       | 100(21), 100(25)                                         | 66.6(12), 79.3(29)                                                     | 0(18), 0(15)                                               | 41.2(17), 43.8(16), 11.8(17), 78.6(28)                                                      | 31(42), 42.1(19), 43.5(23)                        |
| <i>asd-2</i>          | 0(45), 0(25)                                       | 24(54), 21.2(52), 27.2(22), 31.6(57), 14.7(102), 20.5(88)                                                                  | 100(15), 91.7(24)                                        | 66.6(21), 64.2(28)                                                     | 0(13), 0(15)                                               | 50(10), 40(20), 85.7(7), 31.3(16)                                                           | 23.8(42), 50(24), 42.9(28)                        |
| <i>B0280.17</i>       | 0(47), 0(28)                                       | 19.8(86), 20.4(54), 17.5(80)                                                                                               | n.d.                                                     | n.d.                                                                   | 0(16), 6.7(15)                                             | 52.6(19), 21.4(14), 15.8(19)                                                                | n.d.                                              |
| <i>F54D1.1</i>        | 6.3(32), 0(100)                                    | 26.5(83), 18.7(107), 40(55), 12.2(245), 20.2(169)                                                                          | 84.2(19), 100(12)                                        | 34.2(38), 56.5(23)                                                     | 0(12), 21.4(14)                                            | 23.3(30), 33.3(12), 18.2(11)                                                                | 21.1(38), 42.1(19), 36.3(22)                      |
| <i>K07H8.9</i>        | 0(63), 0(32)                                       | 18.8(48), 14.5(110), 11.4(70), 12.5(56), 16.1(56)                                                                          | n.d.                                                     | n.d.                                                                   | 0(10), 0(14)                                               | 0(13), 27(30), 5.3(19)                                                                      | n.d.                                              |
| <i>Y69A2AR.32</i>     | 0(49), 0(41)                                       | 27(52), 20.3(64), 9(47)                                                                                                    | n.d.                                                     | n.d.                                                                   | 0(14), 0(15)                                               | 44(25), 37.5(24)                                                                            | 19.4(36), 37(27), 40(20)                          |
| <i>bcc-1</i>          | 0(55), 0(51)                                       | 14.3(202), 8.5(82), 14.4(111), 5.6(54), 15.3(118), 16.7(78)                                                                | n.d.                                                     | n.d.                                                                   | 0(14), 0(13)                                               | 37(27), 9.1(11), 21.7(23), 12.5(24)                                                         | n.d.                                              |
| <i>C41G7.3</i>        | 0(49), 0(33)                                       | 21.9(64), 4.5(67), 11.3(71), 23.9(46), 19.8(116)                                                                           | n.d.                                                     | n.d.                                                                   | 0(13), 0(13)                                               | 37.5(24), 63.3(30), 35.7(14)                                                                | 54.2(24), 30.6(36), 48.2(29)                      |
| <i>pno-1</i>          | 0(34), 0(40)                                       | 13.6(110), 29.2(89), 12.1(149), 16.3(153), 22.7(132)                                                                       | n.d.                                                     | n.d.                                                                   | 0(15), 0(15)                                               | 41.4(29), 51.6(27), 27.6(29)                                                                | 20(40), 25(36), 39.1(23), 26.1(23)                |
| <i>mask-1</i>         | 0(60), 0(39)                                       | 21.2(85), 28.3(46), 25.8(62)                                                                                               | 100(24), 100(27)                                         | 64.7(17), 56.5(23)                                                     | 0(15), 0(15)                                               | 56(12), 30(20), 66(25)                                                                      | 16.2(31), 50(15), 33.3(24)                        |

a n.d. - not determined
